# Supplementary material for: Drinking by amphibious fish: convergent evolution of thirst mechanisms during vertebrate terrestrialization
Source: Sci Rep. 2018 Jan 12;8:625. doi: 10.1038/s41598-017-18611-4 (PMC5766589; doi:10.1038/s41598-017-18611-4)
Supplement: Supplementary file 1 — Supplementary Information [file 41598_2017_18611_MOESM1_ESM.pdf]

## Supplementary Information

**Title:** Drinking by amphibious fish: convergent evolution of thirst mechanisms during vertebrate terrestrialization

**Author affiliation:** Yukitoshi Katayama<sup>1,\*</sup>, Tatsuya Sakamoto<sup>2</sup>, Kazuhiro Saito<sup>2</sup>, Hirotugu Tsuchimochi<sup>3</sup>, Hiroyuki Kaiya<sup>4</sup>, Taro Watanabe<sup>1</sup>, James T. Pearson<sup>3</sup>, Yoshio Takei<sup>1</sup>

<sup>1</sup>Laboratory of Physiology, Atmosphere and Ocean Research Institute, University of Tokyo, 5-1-5 Kashiwanoha, Kashiwa, Chiba 277-8564, Japan

<sup>2</sup>Ushimado Marine Institute, Faculty of Science, Okayama University, 130-17 Kashino, Setouchi, Okayama 701-4303, Japan

<sup>3</sup>Department of Cardiac Physiology, National Cerebral and Cardiovascular Center Research Institute, 5-7-1 Fujishirodai, Suita, Osaka 565-8565, Japan

<sup>4</sup>Department of Biochemistry, National Cerebral and Cardiovascular Center Research Institute, 5-7-1 Fujishirodai, Suita, Osaka 565-8565, Japan

**\*Corresponding author:** Yukitoshi Katayama, Laboratory of Physiology, Atmosphere and Ocean Research Institute, University of Tokyo, 5-1-5 Kashiwanoha, Kashiwa, Chiba 277-8564, Japan

E-mail address: katayama3g@aori.u-tokyo.ac.jp

Tel: +81-4-7136-6204, Fax: +81-4-7136-6206

## 20    **Supplementary Methods**

21

22    ***In situ* hybridization of AT1.**    The brains were fixed in 4% paraformaldehyde in phosphate buffer  
23    (PB) and embedded in Palaplast (McCormick Scientific, Richmond, IL, USA). Serial sections were  
24    cut at 7  $\mu$ m to obtain cross sections and mounted onto MAS-coated slides (Matsunami Glass, Osaka,  
25    Japan). The cDNA fragment (1095 bp) specific to *at1* was amplified using gene-specific primers  
26    (ATGAAGAACATAACCTCAGGAGCAG, TCATTTAATGTCAGAGGAAGACTTG) and used to  
27    synthesize digoxigenin-labeled antisense and sense cRNA probes (DIG RNA Labeling Kit; Roche  
28    Applied Science, Mannheim, Germany) according to the manufacturer's protocols. The rehydrated,  
29    rinsed sections were treated with 5 mg/ml proteinase K (Sigma-Aldorich, MO, USA) in Tris-EDTA  
30    buffer [100 mM tris (hydroxymethyl) aminomethane and 50 mM ethylenediaminetetraacetic acid, pH  
31    7.5] and then hybridized with 1  $\mu$ g/ml DIG-labeled cRNA probes in hybridization buffer [50%  
32    formamide, 5  $\times$  Saline Sodium Citrate Buffer (5  $\times$  SSC, 750 mM NaCl and 75 mM sodium citrate,  
33    pH 7.0), 40  $\mu$ g/ml bovine calf thymus DNA] at 58°C for 40 h. After hybridization, sections were  
34    washed in 2  $\times$  SSC for 30 min at room temperature, followed by 1  $\times$  SSC for 1 h at 65°C, and finally  
35    in 0.1  $\times$  SSC for 1 h at 65°C. Following immunohistochemical reaction with alkaline phosphatase-  
36    conjugated anti-DIG antibody (Roche Applied Science, Upper Bavaria, Germany), hybridization  
37    signals were visualized with 4-nitro blue tetrazolium chloride (450 mg/ml) and X-phosphate/5-  
38    bromo-4-chloro-3-indolyl-phosphate (175 mg/ml) after 1 week at room temperature. Stained sections

39 were dehydrated with ethanol, cleared with xylene, coverslipped, and observed under a microscope  
40 with image sensor (FSX100, Olympus, Tokyo, Japan).

41

42 **c-Fos immunohistochemistry.** The brains were dissected out 1 h after ICV injection of AngII or  
43 vehicle and fixed in 4% paraformaldehyde in PB. The fixed brains were cut at 7  $\mu$ m. The sections  
44 were immersed in methanol containing 0.3% H<sub>2</sub>O<sub>2</sub> for 30 min at room temperature. After rinsing in  
45 phosphate buffered saline (PBS), the sections were incubated with proteinase K (10 mg/ml in PBS)  
46 for 10 min at room temperature. The sections rinsed thoroughly in PBS were pretreated with a  
47 blocking solution (2% normal goat serum, 0.01% NaN<sub>3</sub> in PBS) for 1 h at room temperature and  
48 incubated with a polyclonal antibody raised against human c-Fos (1:200, sc-253, SantaCruz, Dallas,  
49 TX, USA) for 12 h at 4°C. Specificity of the antibody against c-Fos protein of the mudskipper was  
50 checked by Western blotting analysis <sup>25</sup>. After rinsing in PBS, the sections were treated with ABC  
51 Elite kit (PK-6101, Vector, Burlingame, CA, USA) according to the manufacturer's instruction. The  
52 sections rinsed in 0.1 M PB were immersed in 0.01% 3, 3' -diaminobenzidine tetrahydrochloride  
53 (DAB) in PB for 3 min to intensify colourization and then incubated in 0.01% DAB solution  
54 containing 0.01% H<sub>2</sub>O<sub>2</sub> for 3 min in dark. Finally, the sections were rinsed in PB and distilled water,  
55 and immunoreactive c-Fos was examined. The photomicrographs were binarized by graphic software  
56 Image J (<https://imagej.nih.gov/ij/>) and the number of c-Fos positive neurons was counted manually  
57 and compared between the cohorts. The parvocellular preoptic area anterior part (PPa) was defined

58 from the rostral tip of the anteroventral region of the third ventricle up to the level where the corpus  
59 callosum emerged caudally. Every third sections was analyzed in order not to count positive cells  
60 twice.  
61

## 62 Supplementary Figures

63

(a)

|               |                                      |            |                                                |     |
|---------------|--------------------------------------|------------|------------------------------------------------|-----|
| Mudskipper    | NQH HKNLT I VKMKRFTLV LLLCSCI FCGSSA | NRVYVHPF   | NLFAAENV-----SCE                               | 50  |
| Medaka        | MQR LQAPLLV VLL-----CC--CLSRAN       | NRVYVHPF   | YLFAAENV-----SCE                               | 39  |
| Zebrafish     | MKMFLAFLFLSCF-----AMART              | NRVYVHPF   | NLFSSNI-----SCE                                | 37  |
| Elephant_fish | MKWALCFLCLGM-----HVALI               | RSNRPHI    | HPFLLMY-----VNK                                | 34  |
| Sea lamprey   | MKLFILLLLAF C-----AALCSP             | CVGGEEDYDD | RPYMQPFHLI PPPL-----SVQ                        | 44  |
|               |                                      | * * *      |                                                |     |
| Mudskipper    | TLQTQTKSLE-TI SM-----VPLDMN-----     | VLTPDI     | RNMSQV-DI QRQNI RETT                           | 93  |
| Medaka        | TLHNQI SKPLETLPV-----SPLDSE-----     | VLTPDN     | RDP SKV-NPQNI TER--T                           | 81  |
| Zebrafish     | VI QSEEHKPLETVHP-----LPPLPG-----     | STDPDP     | RTASAAESLKNLTQR--T                             | 80  |
| Elephant_fish | TQSDDQVN---NKTFLPPLAEFLKLQARM-----   | VPD---     | SGSSDDEDQAHPKTKQI W                            | 81  |
| Sea lamprey   | ATEQPLASNE-TWDYPEPLAPGQSPAASSEE      | GSSEEK     | GDERSHRGEGRRGRKDKYKSKT                         | 103 |
| Mudskipper    | AVLAKLLNSVGLRM-YQALS-GKQQSS-----     | NTLLSP     | VNT-----YGSLVTFY                               | 135 |
| Medaka        | AVLAGLLNPLGLRM-YVALS-RKQRSE-----     | NTLFS      | PVNT-----CGSLFSFY                              | 123 |
| Zebrafish     | AVLAELQNSLGLRM-YQTLS-RTQKHT-----     | NTLLS      | PNA-----FGALVTLY                               | 122 |
| Elephant_fish | LKERN--TKLQAVAI SQTENTVVLNH-----     | AFPPNR     | CADLVLSPLQI YSSSLAALS                          | 131 |
| Sea lamprey   | QRI ASAVNGLGFRLYKQVLGGAGPADNI        | FFSPLSI    | ASALGVVAA-----GANGS                            | 152 |
| Mudskipper    | LGA AKKTARSYQLLLGLSSDT-DREDCVSL      | VDGHRV     | LRTLQSI NSLVDDGPKDEI-STQV                      | 193 |
| Medaka        | LGASKTTASYFLRLLGLSDTD-REE-CLSI       | VDGHKV     | LGT LQNI HSLVDDGPKKEI-TTQV                     | 180 |
| Zebrafish     | LGASKKTAI SYQQLLGLNLES-EQTDCA        | YFVDGHT    | VLRTLQAI S--AHVDES RKELRTL V                   | 179 |
| Elephant_fish | LGAANATAQI FHDILGFTSSSQVTTANL        | REKDAS     | VRQLN----DFLLSWLPGRYL-ST-R                     | 185 |
| Sea lamprey   | TRALD TALGFKELLHGKKKAKSMKYF          | ARLNSAL    | YRRSAGFELMGKNVVF SKKGL--WLY                    | 210 |
|               | * * *                                |            |                                                |     |
| Mudskipper    | WAF TPTHTQL-SVDFVHGTQDF-SDSSFI       | RSVDFS     | NTQETEQQVNSFVEKTS GGGKVKNI F                   | 251 |
| Medaka        | WAFARKGAQL-SRDFI QGTQDF-SDSSYI       | RGVDFS     | NPQETEKLLNSFVEKTSNGSLRN VF                     | 238 |
| Zebrafish     | WTFVNSDADL-SKEFLRG TQDF-SDFS         | VRSVDF     | SQAKDAEVEVNNFI QKTS DNKVKSMF                   | 237 |
| Elephant_fish | NWI FVQRDI K-VLESFAVNAKEFY           | NVNL LAI   | DFTHTPLAEQLI NRY-MHNASGGGRVKDP                 | 243 |
| Sea lamprey   | RQFTRTVAHLFKSNVRSVDFGESKEA           | VELMNA     | YI EKVT-----SKKFTDVI SDVDTATSL                 | 265 |
|               |                                      |            | *                                              |     |
| Mudskipper    | T-ELNTSSNLXFLSSF--NFQGNWKT           | VFQA       | EKTSEQEFYVDETTTI MTPV--MMHTGP--                | 304 |
| Medaka        | A-DLNSSNI LFLSSF--NFQGWKTA           | FQPEK      | TSLQEFYVNPTTTVMSPM--MTRTGH--                   | 291 |
| Zebrafish     | K-GVTPKTDLLFASSV--HFQGNWKT           | AFQPE      | ATSD--QDFWTQKNSSVQVPFMMHTGD--                  | 290 |
| Elephant_fish | VI GLSPTATMMSASYM--EFK GKWK          | KAF--      | ESHTTELQDFFI EEDRRI RVPTMSQAGWFQ               | 299 |
| Sea lamprey   | MI VNVI YFKGSWANKFEPDLTKN            | VRFW--     | --VNSS--YSMMPVTMHQRAKLSYAQDR--                 | 316 |
| Mudskipper    | --YHYLNDKVRRC                        | TVVKLS     | LSKRSYMLLVLPHEGTS LGEI E----SKLLTVI SYWNENLQ   | 358 |
| Medaka        | --YHYLNDKLRRC                        | TVLKL      | SLSKQAYMMLVLPHEGVNLSDI ETEA-NLHTNVFSAWHQNLQ    | 348 |
| Zebrafish     | --YKYLD DAGRKCSI                     | VRLGL      | SKRTFMLLVLPHEGASLQDI EKPLLTVI PTWL RHLKEKYL    | 348 |
| Elephant_fish | GI VAHEYTAI KLP                      | MAGSTS     | -MTI VQPVKVDLMQKI HRKLPI RTI FEQLQSRFVKVSLP--  | 356 |
| Sea lamprey   | --KLRSTVI KLP                        | YEGGAS     | MLVI VPHRTEELPKVEESVSQEQL EEWLSLLGPSNHVYQL-    | 372 |
| Mudskipper    | EGLLELSLPKF                          | SMSAVNNL   | HDL LANMDPEI EAKLLGAQAEFSQLSNTKPFTVYKALNKVT    | 418 |
| Medaka        | EGPLELSLPKL                          | STSSVNDL   | NELLTNMNP EI EAKLLGSEAEFSQLSNI TLFSI DKA VNTVR | 408 |
| Zebrafish     | ELSLPKFSLT                           | AVTDLRS    | VLSE--MAVEKYL MG--SD-ASFRMRSSKENFTVDKVLNKVV    | 402 |
| Elephant_fish | -----KFKL                            | DDTTYNI    | KDI FLRMKGP--DAFSSEADFSRLSNDGRLKPDKVTNNI N     | 404 |
| Sea lamprey   | -----SLPK                            | FKI SVSYDL | KAYLSAMGMP--SMFSYGADLSRI TGMQKLHVDKI THKSV     | 423 |
|               |                                      |            | * *                                            |     |
| Mudskipper    | FEMSEEGTDAQTKTQDG---                 | GIPLKLSI   | NRPFFFS-IIEEDSGAILMLGKI INPAL---               | 470 |
| Medaka        | FDMSEEGAEPQDKKEA---                  | GVPLRLS    | FNRPFFFS-VIEGYNNAILLLGKI TNPLL---              | 460 |
| Zebrafish     | FEMTEGGSEVQNR                        | TDDG---    | RAPHKVTFNRPFFFA-VVEGNSNAI LMLGKI INPTA---      | 454 |
| Elephant_fish | FELTE-DWEEP                          | VAGQNVQF   | --NNATEI KINRPFLFH-VYDDVSNTLLFVGRVKNLTEYDQ     | 460 |
| Sea lamprey   | LHVNEEGTEAKA                         | ETVVGIMPI  | SMPPTVTVD RPFVLLI YDEKTRAVI FMGRVA-DPKQ---     | 479 |
|               | *                                    |            | ** *                                           |     |
| Mudskipper    | -                                    |            |                                                |     |
| Medaka        | -                                    |            |                                                |     |
| Zebrafish     | -                                    |            |                                                |     |
| Elephant_fish | N                                    |            |                                                | 461 |
| Sea lamprey   | -                                    |            |                                                |     |

64

(b)

|                   |                                                            |     |
|-------------------|------------------------------------------------------------|-----|
| Mudskipper_AT1    | MKNITSGAE- - - - - SDGILNLTGMSGNH- - - - - FIFTLXPIVYGCNX  | 38  |
| Medaka_AT1        | MQNQ- AWA- - - - - TKEILNLTGMSGSHK- - - - - FIFTLVPIVYSFNF | 37  |
| Zebrafish_AT1a    | MENQT- SAM- - - - - SEDLHVNCMSGRHG- - - - - FIFTFIPVYGCNF  | 37  |
| Japanese eel_AT1  | MENLT- VGR- - - - - TEGIHITCNTSGRHS- - - - - YIYTLIPVYGCNF | 37  |
| Zebrafish_AT1b    | MDNVT- SDS- - - - - NTGLALACNMTGHS- - - - - FIFTFIPVYSFNF  | 37  |
| River lamprey_AT1 | MSGVD- VANESLAALHNGTAIKNLASERCPAAFTNPTTLTAVPVMYGLIF        | 49  |
|                   | * * * * *                                                  |     |
| Mudskipper_AT1    | I IGLVGNSMVVAVI YCYMKLKTVAHI FVLNLAI SDLTFLITLPMWATMTA     | 88  |
| Medaka_AT1        | I IGIIGNTMVVAVI YFYMKLKTVANI FVLNLAI SDLTFLITLPMWATFTA     | 87  |
| Zebrafish_AT1a    | V IGIIGNSMVVAVI FRYMKLKTVANFVLNLAI SDLTFLITLPLWATFTA       | 87  |
| Japanese eel_AT1  | V IGI VGNSMVVAVI YCYMKLKTVANI FVLNLAVSDLTFLITLPMWATFTA     | 87  |
| Zebrafish_AT1b    | I IGLI GNSLVVAVI YFCLKLKTVANI FVFNLAVSDLTFLITLPIWAI STA    | 87  |
| River lamprey_AT1 | VAGLVGNTMVVAVVLKYLKLRNVANVYI VNLATADLVFVTTLPLWAASVA        | 99  |
|                   | * * * * *                                                  |     |
| Mudskipper_AT1    | TGYHWPFGGFLCKATAALASFNLTYTSI FFLTALSI DRYLAI VHPVSSRRF     | 138 |
| Medaka_AT1        | TEYSWPFGGFLCKTSAGLVTFNLYTSVFFLTALSTDYLAIVHPVQSRRF          | 137 |
| Zebrafish_AT1a    | TGYHWI FGAFLCKASAGMVI FNLYTSI FFLTALSI DRYLAIVHPVRSRRQ     | 137 |
| Japanese eel_AT1  | MGYNWPFGGFLCKASAGLTI FNLYTSI FFLTSLSI DRYLAIVHPVRSRQR      | 137 |
| Zebrafish_AT1b    | TGYHWLFGDLLCKTI AGMALLNLYTSI FLLTALSVDYLAIVHPVQSRRC        | 137 |
| River lamprey_AT1 | RGYDWPFGGFLCRVSATVVSVMYASI LLLACMSVDYLAIVRPLQSRGR          | 149 |
|                   | * * * * *                                                  |     |
| Mudskipper_AT1    | RTVLYARI TCVLI WLFALLLSVPI ALTRDI HNI NNRNLTVCAI LHPTKDN   | 188 |
| Medaka_AT1        | RTVVYARI TCVVI WLFVFLSVPTALTRDVHDI KNPQTTVCGI LHPKAEN      | 187 |
| Zebrafish_AT1a    | RTLFIYANLT CVLI WLFALLLSAPTALS RDVYDI GNLTLCV- - - - WHSS  | 182 |
| Japanese eel_AT1  | RTVVYARI TCVLI WAFALLLSLPTALS RDVFTI NHPNTTVC- - - - GTLD  | 182 |
| Zebrafish_AT1b    | RTVIYARVTCVLVWVVSFGLSLPTAI I RGTHFI QDNNVTVC- - - - AIHH   | 182 |
| River lamprey_AT1 | RTRRRARAAACVVVWVTAVLLSVPVA- - VFRVTFVHGGRTVC- - - - ALR    | 191 |
|                   | * * * * *                                                  |     |
| Mudskipper_AT1    | VQSLEQVLLAI SLMKSLLGFLLPFII I ITCYCLIGRALLGARHI QKSSQS     | 238 |
| Medaka_AT1        | SERLKELLLLAI GVLKSLLGFLVPFII I ITCYCLIGRALLRVKHI QKNSRS    | 237 |
| Zebrafish_AT1a    | KQI - - HFLVTL SVLKSVLGFI VPFLI IFTCYCLIGRALLGSRGLLRKSVR   | 230 |
| Japanese eel_AT1  | KNELSHVLVAI GLMKSVLGFLI PFV I I VTCYCLIGRALLEARRVQSSRSR    | 232 |
| Zebrafish_AT1b    | KEDIRNVLAALSLMKSVFGFLPI TVI LTCYCLIGRALPKARDI QRNARS       | 232 |
| River lamprey_AT1 | YPSARTWFLAMNVTRNVAGFLVPFLVI VTCYSLI GRTLLRRGGDVVRDK        | 241 |
|                   | * * * * *                                                  |     |
| Mudskipper_AT1    | RD- DEVLRLMAAAVLAXFVCWVPHQI FHFMQLLTQLS- KTDNCRLLLEI I D   | 286 |
| Medaka_AT1        | RD- DEVLHMLAAAVLAFFLCWAPHQVFHFMQLLTQQI LVENCTMLEI I - D    | 285 |
| Zebrafish_AT1a    | SREDETLRMI AATVLAFFVCWAPHQAFHFMEELLATLG- VVENCQTLDDI D     | 279 |
| Japanese eel_AT1  | GDEVLQ- - MAAVLAFFLCWVPHQI FHFMHVLLALK- VIENCPTLDI I D     | 279 |
| Zebrafish_AT1b    | NG- DEVLNMLAAAALSFFLCWAPHQI FNFMEMLLLLK- VI TSCDVVDI I D   | 280 |
| River lamprey_AT1 | VLPA- VLAVVLAFFLCWL PYHVLTLTLDTLVRLRVLRGCGVTA AVDAAMPV     | 290 |
|                   | * *                                                        |     |
| Mudskipper_AT1    | TVMPFTI CIAYFNSCVNPI VYGFVGRNFRKNLVRLRLHCPASVRGAHPSI       | 336 |
| Medaka_AT1        | TAMPFTI CIAYFNSCMNPI VYGFVGRNFRKNLLRLLRCSPGRPAGPHQSI       | 335 |
| Zebrafish_AT1a    | TAMPFTI CI SYLNSCVNPI LYGFVGNFRKNLLRLLSCG- SGEASNRFSI      | 328 |
| Japanese eel_AT1  | SALPFTI CIAYFNSCMNPI LYGFVGRNFRNLLRLLRCG- PGSAPRHSHI       | 328 |
| Zebrafish_AT1b    | TGMPFTI CIAFFNSCMNPI LYSFVGKNFRNLLKLLRCS- - - STSVASHI     | 327 |
| River lamprey_AT1 | AV- - - - VVAYTNSCLNPLL YSFVGKGRQGFGRLLRLS- - - - - AYVP   | 328 |
|                   | * * * * *                                                  |     |
| Mudskipper_AT1    | SSKMSAL- - SFRASEALSLTVKNKSSSDI K- - -                     | 364 |
| Medaka_AT1        | SSKMSAL- - SFRASEALSLTVKSNVSTDVK- - -                      | 363 |
| Zebrafish_AT1a    | NSKIDVN- - SHCNSGLLNQTSKNDASAMVKAS                         | 359 |
| Japanese eel_AT1  | SLTTKMSTLSYRASETLRLTSGKAASSQPAK- -                         | 359 |
| Zebrafish_AT1b    | ALSTKMSSLSYRTSELSHLSVI KTPSLPRAT- -                        | 358 |
| River lamprey_AT1 | RPLASSFTRSSLR- - - - - SRVEMENIR- - -                      | 352 |

(c)

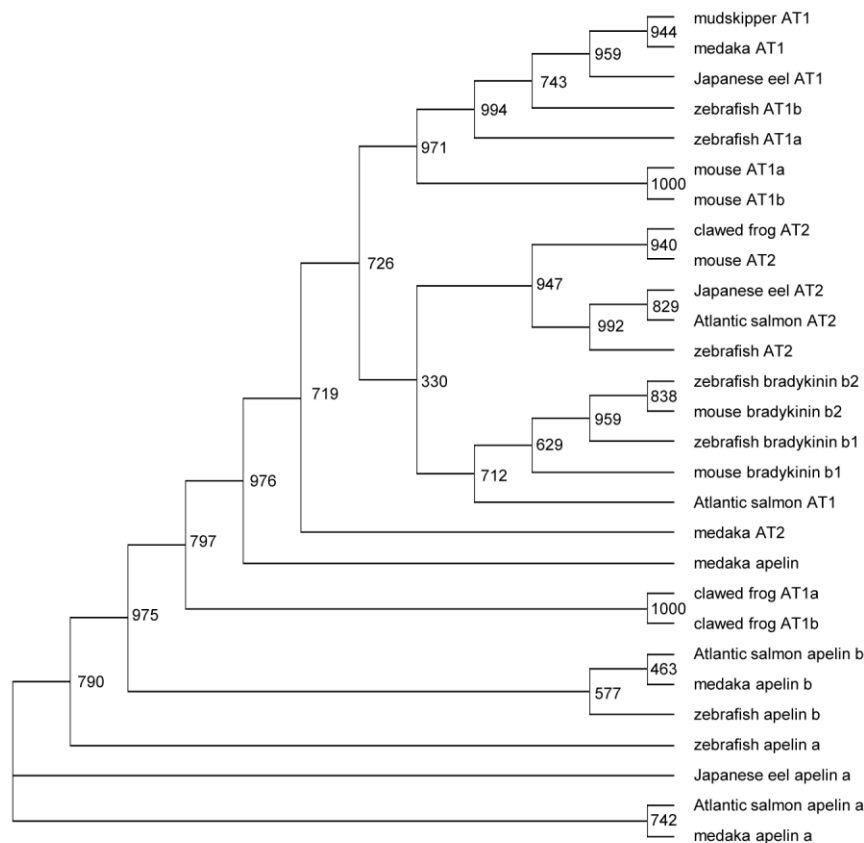

66

67 **Supplementary Figure 1. Amino acid sequences of angiotensinogen and angiotensin receptor**

68 **type 1 (AT1).** (a) Alignments of angiotensinogens of different fish species. Shaded regions indicate

69 conserved amino acids between the mudskipper and other fish in the sequence converted to

70 angiotensin II (AngII). (b) Alignments of several AT1s of different fish. (c) The phylogenetic tree

71 including AT1, angiotensin receptor type 2 (AT2), apelin receptors, and bradykinin receptors.

72 Numbers represent bootstrap values.

73

74

75

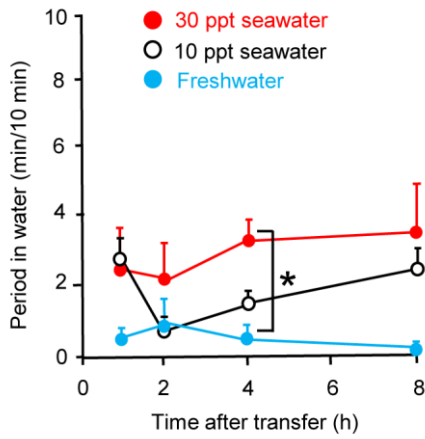

76

77 **Supplementary Figure 2. Effects of environment salinities on amphibious behaviour.**

78 Mudskippers were transferred from the tank for acclimation (10-ppt seawater) to tanks containing

79 freshwater (●,  $n = 6$ ), 10-ppt seawater (○,  $n = 6$ ) and 30-ppt full-strength seawater (●,  $n = 6$ ).  $*P <$

80 0.05 with two-way repeated measures ANOVA and Dunnett's post-hoc test.

81

82

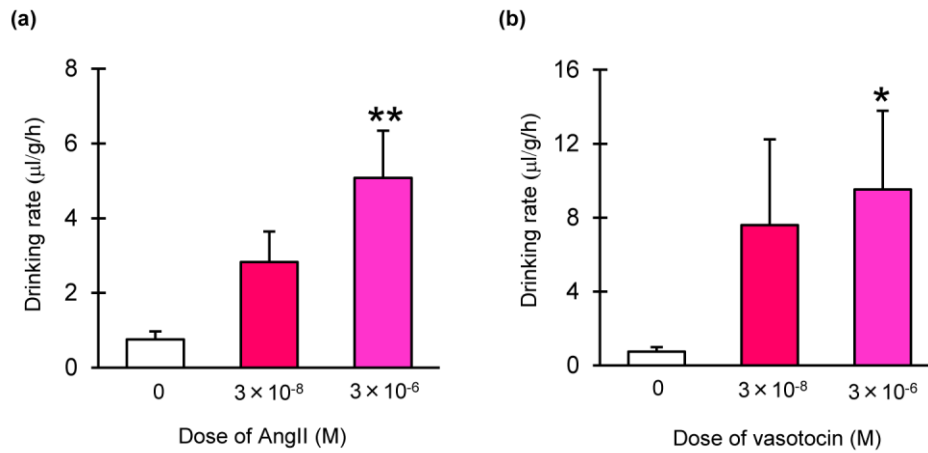

83

84 **Supplementary Figure 3. Dose-dependent effects of angiotensin II (AngII) and vasotocin on**

85 **drinking rate.** Fish were put in a columnar tank (diameter-65 mm, height-92 mm) containing phenol

86 red in 10-ppt seawater after intracerebroventricular injection with 0.1 μl/g of  $3 \times 10^{-6}$  M (n=5),  $3 \times 10^{-8}$

87 M (n=5), and vehicle (n = 8) of AngII (a) or vasotocin (b). Mudskippers were held in water for 1 h.

88 One-way repeated measures ANOVA and Tukey's post-hoc test were used for statistical analysis.

89 Data are shown as mean ± s.e.m. \* $P < 0.05$ , \*\* $P < 0.01$  versus controls.

90

91 **Supplementary Movie Legends**

92

93 **Supplementary Movie 1. Visualization of swallowing of buccal/opercular water on land by X-**

94 **ray.** In X-ray movies, concentration of shadow indicates the radiopacity of contrast medium. The

95 medium was stored in the esophagus to some extent and immediately flowed to the intestine. The

96 mudskipper does not have a stomach and the esophagus is connected directly to the proximal

97 intestinal swelling. This movie is  $5 \times$  faster than actual recording speed.

98

99 **Supplementary Movie 2. Visualization of the migration to water followed by the capture of**

100 **water in the buccal/opercular cavity.** The contrast medium that the mudskipper acquired in the 96-

101 well microplate hole was held in the buccal/opercular cavity on land (on top of the microplate). This

102 movie is played at actual recorded frame rates.
